# Supplementary material for: Characterization of a Ran gene from Puccinia striiformis f. sp. tritici involved in fungal growth and anti-cell death
Source: PubMed Central journal article supplement (PMC5062253; doi:10.1038/srep35248), 2016-10-13
Supplement: srep35248-s1.pdf [file srep35248-s1.pdf]

**Characterization of a Ran gene from *Puccinia striiformis* f. sp. *tritici* involved in fungal growth and cell death**

**Yulin Cheng<sup>1#</sup>, Juanni Yao<sup>2#</sup>, Yanru Zhang<sup>2</sup>, Shumin Li<sup>2</sup>, Zhensheng Kang<sup>2\*</sup>**

<sup>1</sup>State Key Laboratory of Crop Stress Biology for Arid Areas, College of Life Sciences, Northwest A&F University, Yangling 712100, Shaanxi, China

<sup>2</sup>State Key Laboratory of Crop Stress Biology for Arid Areas, College of Plant Protection, Northwest A&F University, Yangling 712100, Shaanxi, China

<sup>#</sup>These authors contributed equally to this work.

<sup>\*</sup>To whom correspondence should be addressed. E-mail: kangzs@nwsuaf.edu.cn

| Target                                                                              | Score<br>(Bits) | Expect      | Alignment<br>Length | Identities | Positives |
|-------------------------------------------------------------------------------------|-----------------|-------------|---------------------|------------|-----------|
| ▶ P. triticina 1-1 BBBB Race 1 (V2): PTTG_02103.4: GTP-binding nuclear protein spi1 | 331.257         | 0.0         | 184                 | 156        | 168       |
| ▶ P. graminis tritici: PGTG_04433.4: GTP-binding nuclear protein spi1               | 328.946         | 0.0         | 184                 | 155        | 167       |
| ▶ P. striiformis PST-78: PSTG_13752.1: GTP-binding nuclear protein spi1             | 328.946         | 0.0         | 184                 | 156        | 166       |
| ▶ P. graminis tritici: PGTG_17558.4: GTP-binding protein ypt1                       | 110.538         | 1.03353E-24 | 161                 | 58         | 91        |
| ▶ P. triticina 1-1 BBBB Race 1 (V2): PTTG_05460.4: GTP-binding protein ypt1         | 110.538         | 1.10487E-24 | 161                 | 58         | 91        |
| ▶ P. triticina 1-1 BBBB Race 1 (V2): PTTG_10008.4: GTP-binding protein ypt5         | 109.768         | 1.54262E-24 | 175                 | 62         | 98        |
| ▶ P. graminis tritici: PGTG_09844.4: rab family protein                             | 108.612         | 3.55322E-24 | 173                 | 61         | 97        |
| ▶ P. striiformis PST-78: PSTG_11722.1: GTP-binding protein ypt5                     | 108.612         | 3.83032E-24 | 162                 | 58         | 94        |
| ▶ P. graminis tritici: PGTG_15757.4: rab family protein                             | 102.064         | 3.86465E-22 | 182                 | 56         | 97        |
| ▶ P. triticina 1-1 BBBB Race 1 (V2): PTTG_04650.4: GTP-binding protein ryh1         | 101.293         | 5.53258E-22 | 182                 | 56         | 97        |
| ▶ P. graminis tritici: PGTG_00987.4: Ras-like protein Rab-8A                        | 99.7525         | 1.59636E-21 | 161                 | 51         | 88        |
| ▶ P. striiformis PST-78: PSTG_12637.1: GTP-binding protein ryh1                     | 99.3673         | 2.03337E-21 | 185                 | 58         | 100       |
| ▶ P. striiformis PST-78: PSTG_11158.1: Ras-like protein Rab-8A                      | 99.3673         | 2.48418E-21 | 161                 | 50         | 88        |
| ▶ P. triticina 1-1 BBBB Race 1 (V2): PTTG_07767.4: GTP-binding protein ypt3         | 98.9821         | 2.70035E-21 | 154                 | 54         | 82        |

⇒ Ran proteins

⇒ Rab proteins

**Figure S1.** A BLAST search using the know Ran protein GSP1 from *S. cerevisiae* as the query in the Broad Institute *Puccinia* database. *PSTG\_13752.1* indicates *PsRan*.

| Target                                                                              | Score (Bits) | Expect      | Alignment Length | Identities | Positives |
|-------------------------------------------------------------------------------------|--------------|-------------|------------------|------------|-----------|
| ▶ P. triticina 1-1 BBBB Race 1 (V2): PTTG_02103.4: GTP-binding nuclear protein spi1 | 345.51       | 0.0         | 195              | 161        | 175       |
| ▶ P. graminis tritici: PGTG_04433.4: GTP-binding nuclear protein spi1               | 343.584      | 0.0         | 195              | 160        | 174       |
| ▶ P. striiformis PST-78: PSTG_13752.1: GTP-binding nuclear protein spi1             | 343.584      | 0.0         | 195              | 161        | 173       |
| ▶ P. graminis tritici: PGTG_17558.4: GTP-binding protein ypt1                       | 110.153      | 1.16146E-24 | 161              | 57         | 91        |
| ▶ P. triticina 1-1 BBBB Race 1 (V2): PTTG_05460.4: GTP-binding protein ypt1         | 109.768      | 1.76274E-24 | 161              | 57         | 91        |
| ▶ P. graminis tritici: PGTG_09844.4: rab family protein                             | 107.457      | 7.91486E-24 | 162              | 58         | 94        |
| ▶ P. triticina 1-1 BBBB Race 1 (V2): PTTG_10008.4: GTP-binding protein ypt5         | 107.457      | 8.74836E-24 | 162              | 58         | 94        |
| ▶ P. striiformis PST-78: PSTG_11722.1: GTP-binding protein ypt5                     | 107.457      | 9.04527E-24 | 162              | 58         | 94        |
| ▶ P. graminis tritici: PGTG_15757.4: rab family protein                             | 100.523      | 9.20281E-22 | 183              | 57         | 97        |
| ▶ P. triticina 1-1 BBBB Race 1 (V2): PTTG_04650.4: GTP-binding protein ryh1         | 100.523      | 9.51514E-22 | 183              | 57         | 97        |
| ▶ P. graminis tritici: PGTG_00987.4: Ras-like protein Rab-8A                        | 99.7525      | 1.87038E-21 | 161              | 51         | 88        |
| ▶ P. striiformis PST-78: PSTG_12637.1: GTP-binding protein ryh1                     | 99.3673      | 2.44279E-21 | 183              | 56         | 98        |
| ▶ P. striiformis PST-78: PSTG_11158.1: Ras-like protein Rab-8A                      | 98.5969      | 3.73846E-21 | 161              | 50         | 88        |
| ▶ P. triticina 1-1 BBBB Race 1 (V2): PTTG_05367.4: Ras-like protein Rab-8A          | 98.5969      | 3.96331E-21 | 161              | 50         | 88        |
| ▶ P. triticina 1-1 BBBB Race 1 (V2): PTTG_07767.4: GTP-binding protein ypt3         | 98.2117      | 4.84201E-21 | 154              | 54         | 82        |

⇒ Ran proteins

⇒ Rab proteins

**Figure S2.** A BLAST search using the know Ran protein GSP2 from *S. cerevisiae* as the query in the Broad Institute *Puccinia* database. *PSTG\_13752.1* indicates *PsRan*.

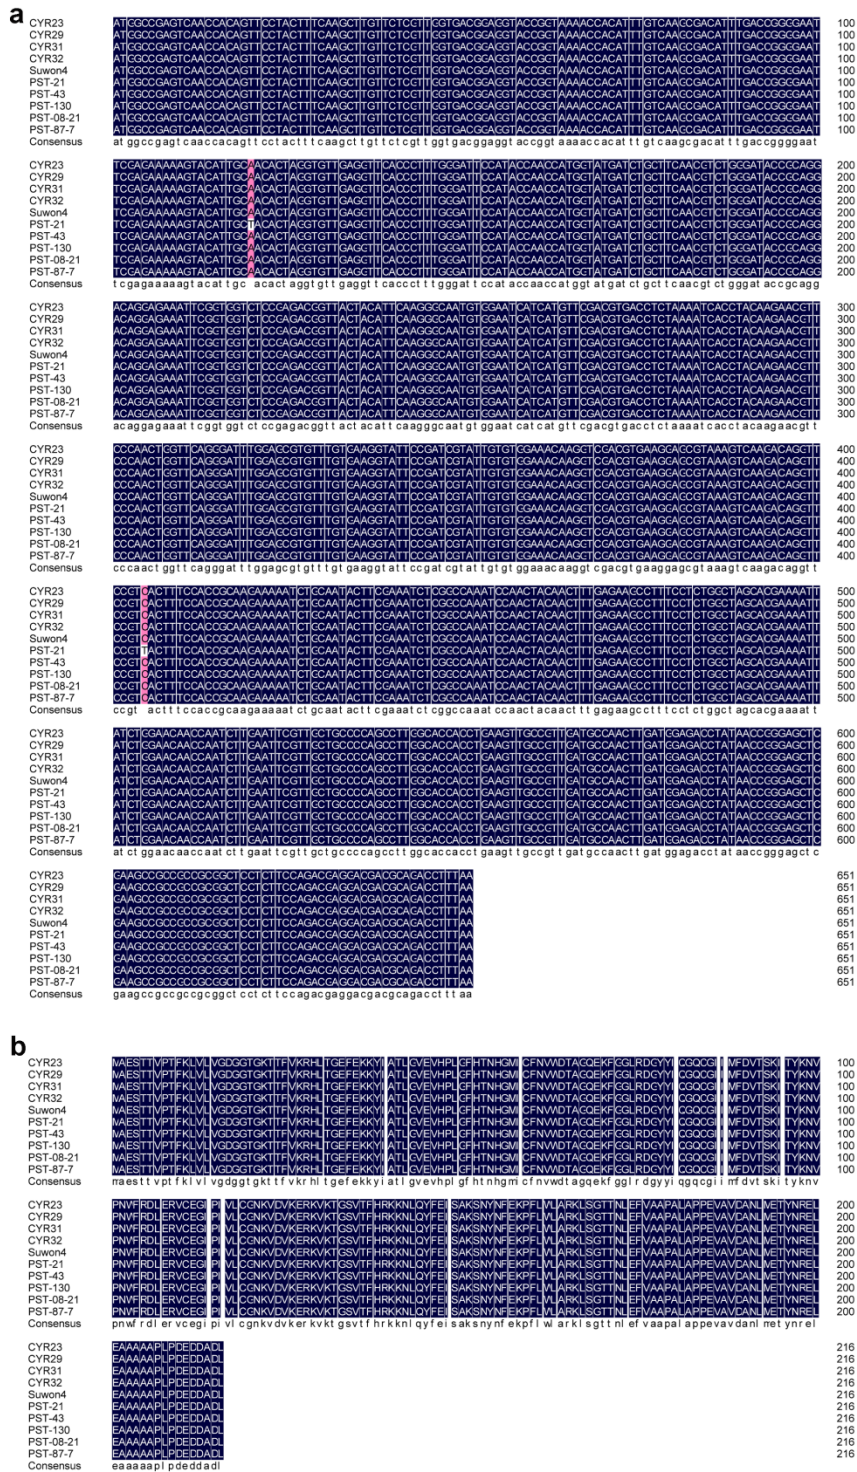

**Figure S3. Sequence alignment of *PsRan* among different *Pst* isolates in the nucleotide level (a) and amino acid level (b). Ten *Pst* isolates were used, including five Chinese isolates (CYR23, CYR29, CYR31, CYR32, and Su11-4), three US isolates (PST-21, PST-43, and PST-130) and two UK isolates (PST-08-21 and PST-87-7).**

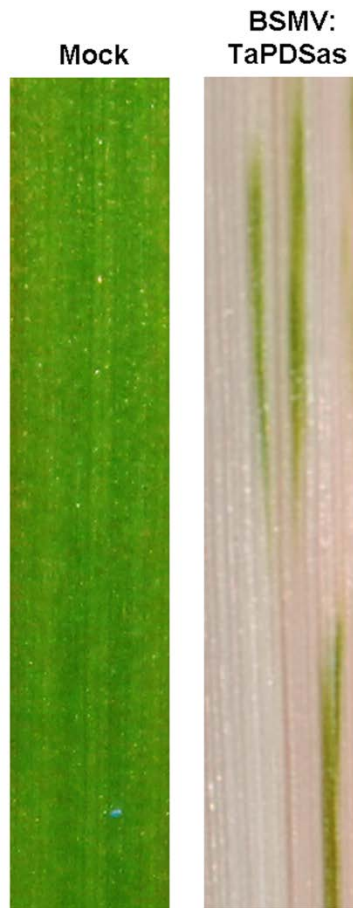

**Figure S4. Phenotypes of wheat plants 10 dpi with FES buffer (Mock) and BSMV:TaPDS, respectively.**

**Table S1 Primers used in this study.**

| Primer name     | Primer 5'-3'                       | Purpose                                                             |
|-----------------|------------------------------------|---------------------------------------------------------------------|
| PsEF1-qRT-F     | TTCGCCGTCCGTGATATGAGACAA           | The endogenous reference for normalization in qRT-PCR               |
| PsEF1-qRT-R     | ATGCGTATCATGGTGGTGGAGTGA           | The endogenous reference for normalization in qRT-PCR               |
| PsRan-qRT-F     | ATTTGGAGCGTGTGGTGTGAA              | qRT-PCR for validation of the expression patterns of PsRan          |
| PsRan-qRT-R     | GACGGAACCTGTCTTGACTTTA             | qRT-PCR for validation of the expression patterns of PsRan          |
| PsRan-PacI-F1   | CCTTAATTAAGACCCAGATTCCGTTTACG      | Clone PsRan-1as to the r vector for HIGS                            |
| PsRan-NotI-R1   | TATGCGGCCGCTACCGGTACCTCCGTCAC      | Clone PsRan-1as to the r vector for HIGS                            |
| PsRan-PacI-F2   | CCTTAATTAAGCCTTGGCACCACCTGA        | Clone PsRan-2as to the r vector for HIGS                            |
| PsRan-NotI-R2   | TATGCGGCCGCGTCTGCGTCGTCCTCGT<br>CT | Clone PsRan-2as to the r vector for HIGS                            |
| PsRan-SpeI-F    | GACTAGTATGGCCGAGTCAACCACAGT        | Clone PsRan to pCAMBIA-1302 for expression in <i>N. benthamiana</i> |
| PsRan-AvrII-R   | TTCTAGGAAGTCTGCGTCGTCCTCG          | Clone PsRan to pCAMBIA-1302 for expression in <i>N. benthamiana</i> |
| PsRan-ClaI-F    | GGCATCGATATGGCCGAGTCAACCACAGT      | Clone PsRan to PVX for expression in <i>N. benthamiana</i>          |
| PsRan-SmaI-R    | GTACCCGGGTTAAAGGTCTGCGTCGTCCT<br>C | Clone PsRan to PVX for expression in <i>N. benthamiana</i>          |
| GFP-XhoI-F      | CCGCTCGAGATGGTGAGCAAGGGCGA         | Clone GFP to pREP3X for expression in <i>S. pombe</i>               |
| GFP-BamHI-R     | GCGGATCCCTTGACAGCTCGTCCATGC        | Clone GFP to pREP3X for expression in <i>S. pombe</i>               |
| Fusion-XhoI-F1  | CCGCTCGAGATGGTGAGCAAGGGCGA         | Overlapping PCR                                                     |
| Fusion-R1       | GGTTGACTCGGCCATCTTGACAGCTCGT<br>C  | Overlapping PCR                                                     |
| Fusion-F2       | GACGAGCTGTACAAGATGGCCGAGTCAA<br>CC | Overlapping PCR                                                     |
| Fusion-BamHI-R2 | GCGGATCCCTAAAGGTCTGCGTCGTCCT       | Overlapping PCR                                                     |
| TaEF1-qRT-F     | TGGTGTCAATCAAGCCTGGTATGGT          | Calculation of fungal biomass                                       |
| TaEF1-qRT-R     | ACTCATGGTGCATCTCAACGGACT           | Calculation of fungal biomass                                       |
